# Supplementary material for: The Emotional Landscape of Pregnancy and Postpartum during the COVID-19 Pandemic in Italy: A Mixed-Method Analysis Using Artificial Intelligence
Source: MDPI journal article supplement (doi:10.3390/jcm12196140), 2023-09-23
Supplement: s1 [file s1]

**Table S1.** Word count and frequency of emotions before and during the pandemic.

Pre – Covid

Total: 3850 words

| Weight     | Word          | Italian words and synonyms           |
|------------|---------------|--------------------------------------|
| <b>276</b> | Happiness     | felicità, felice                     |
| <b>196</b> | Joy           | gioia                                |
| <b>192</b> | Exciting      | emozionante, eccitazione, eccitato   |
| <b>149</b> | Emotion       | emozione, emozioni                   |
| <b>138</b> | Shared        | condiviso                            |
| <b>104</b> | Sharing       | condivisione, condividere            |
| <b>102</b> | Family        | famiglia                             |
| <b>101</b> | Calm          | sereno, calmo                        |
| <b>96</b>  | Painful       | doloroso                             |
| <b>89</b>  | Tranquility   | tranquillo, tranquilla, tranquillità |
| <b>84</b>  | Husband       | marito                               |
| <b>83</b>  | Pain          | dolore                               |
| <b>69</b>  | Love          | amore                                |
| <b>67</b>  | Serenity      | serenità                             |
| <b>54</b>  | Fear          | paura                                |
| <b>37</b>  | Joyful        | gioioso                              |
| <b>37</b>  | Safety        | sicurezza                            |
| <b>24</b>  | Support       | sostegno, supporto                   |
| <b>21</b>  | Anxiety       | ansia                                |
| <b>20</b>  | Intense       | intenso                              |
| <b>18</b>  | Hope          | speranza                             |
| <b>17</b>  | Exhausting    | faticoso                             |
| <b>16</b>  | Festivity     | festa                                |
| <b>16</b>  | Assisted      | assistito                            |
| <b>15</b>  | Relatives     | parenti                              |
| <b>12</b>  | Life          | vita                                 |
| <b>12</b>  | Union         | unione                               |
| <b>12</b>  | Water         | acqua                                |
| <b>11</b>  | Unforgettable | indimenticabile                      |
| <b>11</b>  | Welcome       | accoglienza                          |
| <b>10</b>  | Friends       | amici                                |
| <b>10</b>  | Relieving     | liberatorio                          |

## Post – Covid

Total: 3872 words

| Weight | Word           | Italian words and synonyms                                                                          |
|--------|----------------|-----------------------------------------------------------------------------------------------------|
| 319    | Fear           | paura, pauroso, terrore, spavento, timore                                                           |
| 190    | Anxiety        | ansia, ansiogeno, ansioso, angoscia, agitato, angosciante, inquietudine, tensione, apprensione      |
| 179    | Loneliness     | solitudine, isolamento, solitario, sola, isolato, abbandonata, solitaria                            |
| 34     | Joy            | felicità, gioia, felice, gioioso                                                                    |
| 32     | Excitement     | emozionante, coinvolgente, appagante, elettrizzante                                                 |
| 25     | Hope           | speranza, speranzosa, ottimismo                                                                     |
| 25     | Uncertainty    | imprevedibilità, incertezza, incerto                                                                |
| 20     | Distance       | lontananza, distanza                                                                                |
| 19     | Concern        | preoccupante, preoccupata, preoccupazione                                                           |
| 19     | Detachment     | distacco, separata, separazione                                                                     |
| 16     | Family         | famiglia, marito, padre, figlio, bambino, coniuge, figlia, genitori, partner, madre, nonna, materna |
| 12     | Contagion      | contagio                                                                                            |
| 10     | Danger         | pericolo, pericoloso                                                                                |
| 10     | Risk           | rischio                                                                                             |
| 8      | Coldness       | freddezza, freddo                                                                                   |
| 4      | Hurried        | frettoloso, affrettato                                                                              |
| 4      | Restrictions   | restrittivo, restrizioni                                                                            |
| 3      | Disappointment | delusione, delusa                                                                                   |

Full list of words is published as raw data in Ravaldi & Vannacci (2020) *COVID-ASSESS Italy—COVID19 related Anxiety and StresS in prEgnancy, poSt-partum and breaStfeeding* [Data set]. Mendeley. <https://doi.org/10.17632/CN38PBWN7R.1>
